# Supplementary material for: Gene-Delivery Ability of New Hydrogenated and Partially Fluorinated Gemini bispyridinium Surfactants with Six Methylene Spacers
Source: MDPI journal article supplement (doi:10.3390/ijms23063062), 2022-03-11
Supplement: s1 [file s1]

SUPPORTING INFORMATION

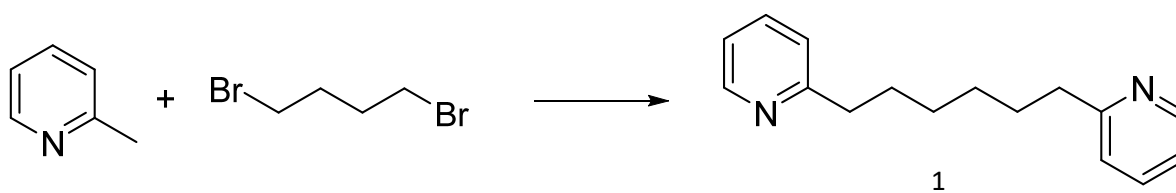

Reagents and conditions: Diethyl ether, BuLi, -20 °C

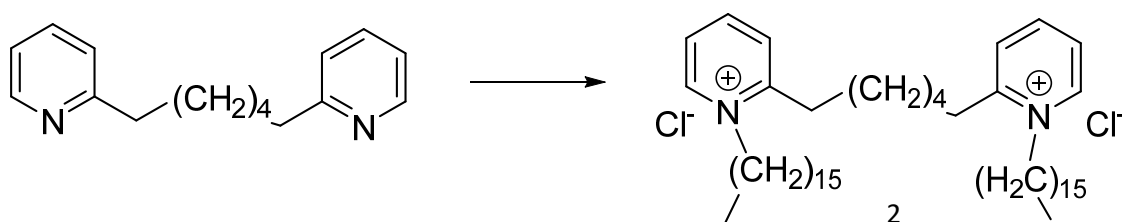

Reagents and conditions: DMF, hexadecyl chloride, 150 °C

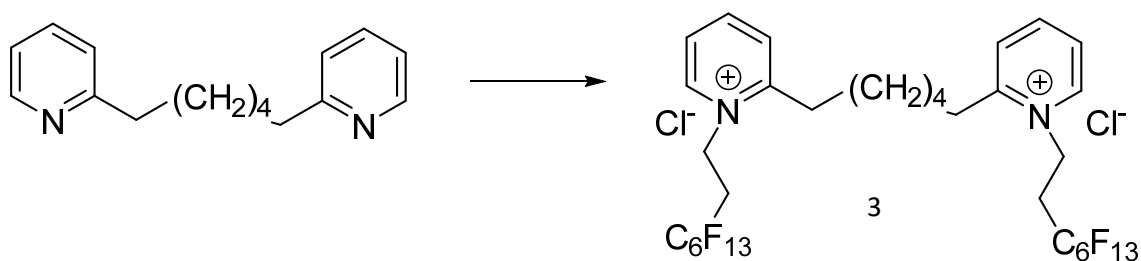

**Scheme S1.** Reagents and conditions: DCM, 1,1,1,2,2,3,3,4,4,5,5,6,6-tridecafluoro-8-(methylsulfonyl) octane chloride, 60 °C

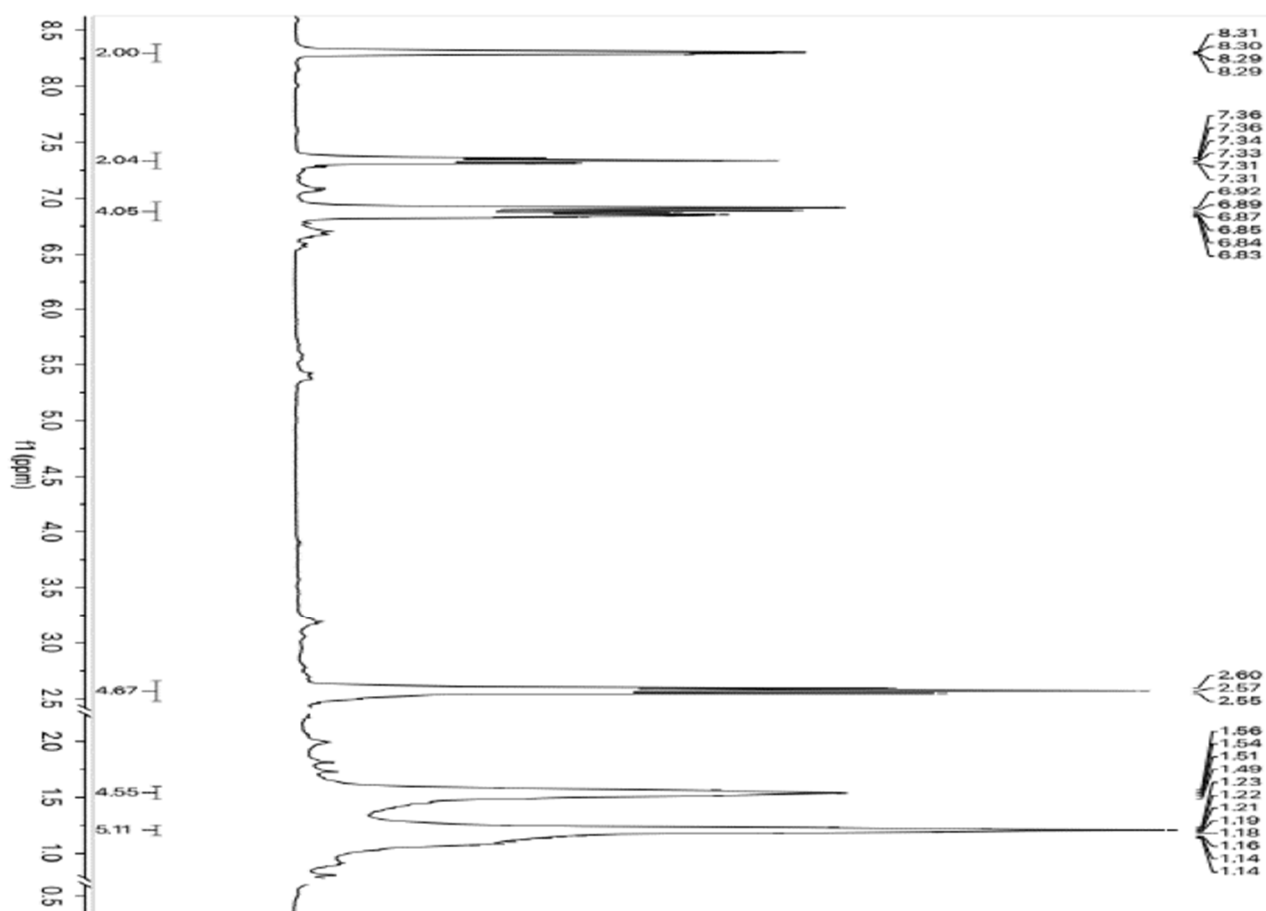

**Figure S1.** <sup>1</sup>H-NMR of 2-[6-(pyridine-2-yl)hexyl]pyridine.

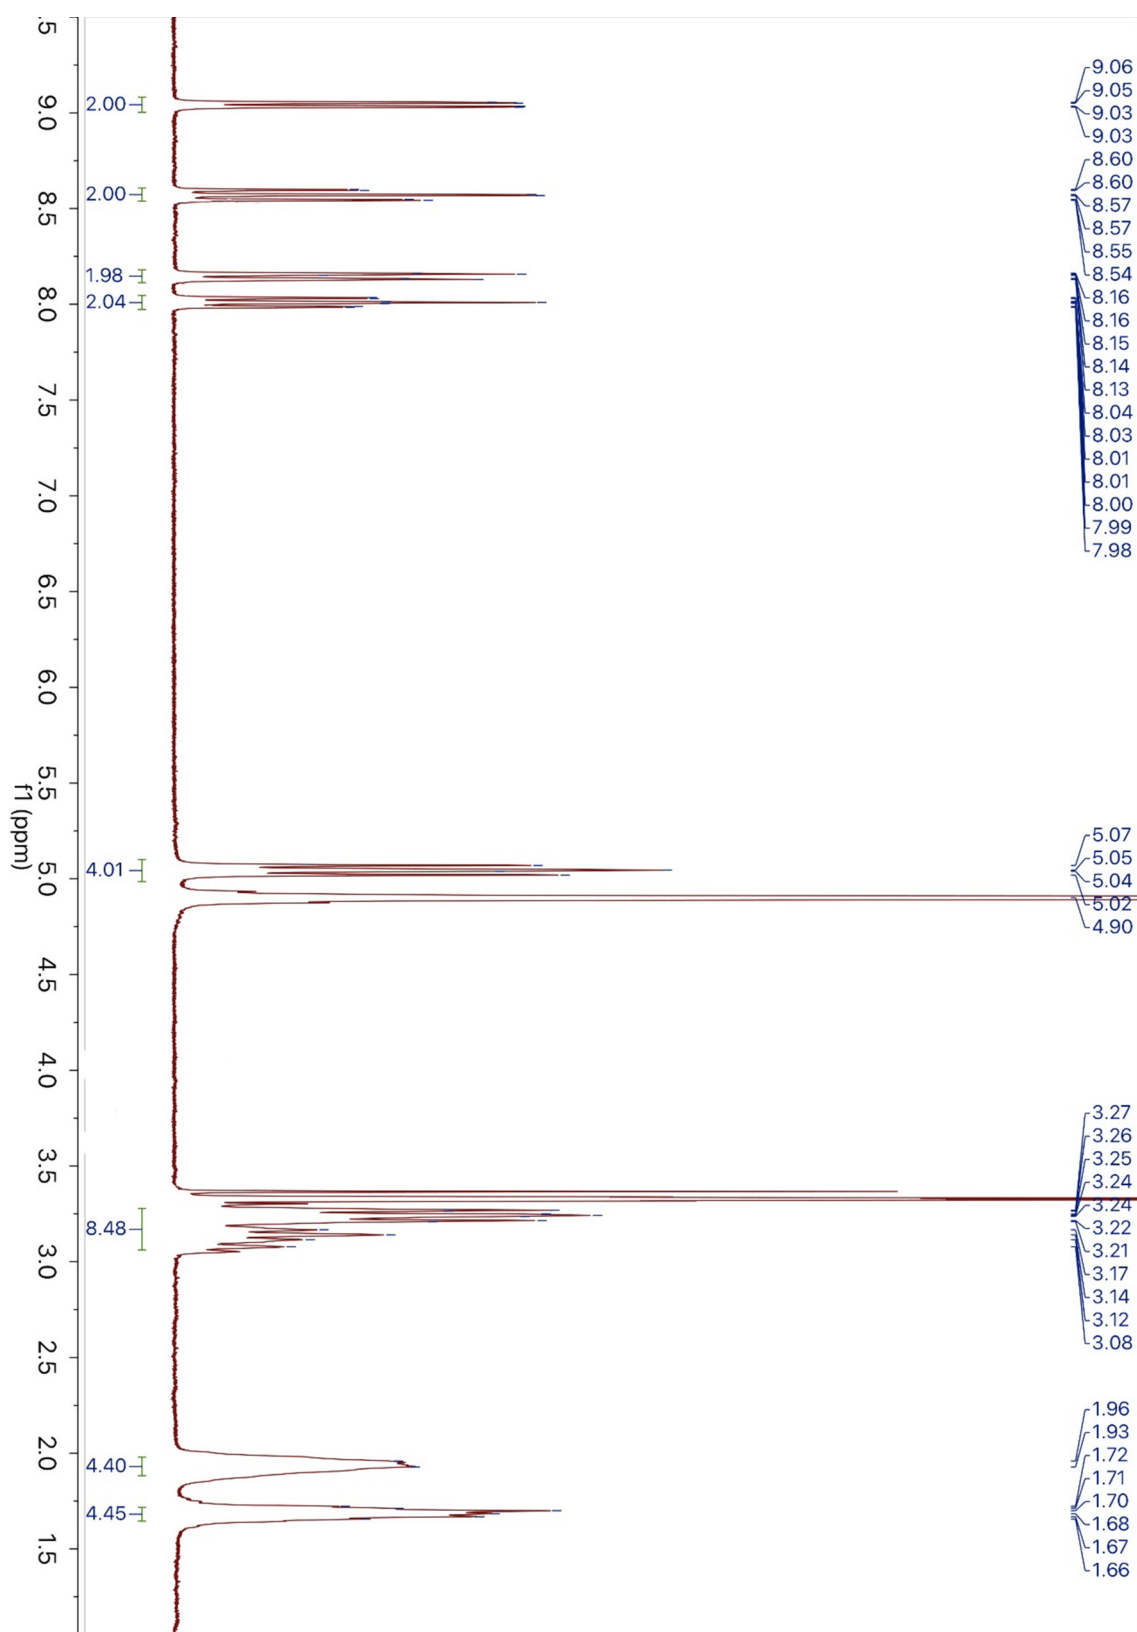

**Figure S2.**  $^1\text{H}$ -NMR of 1,1'-bis(3,3,4,4,5,5,6,6,7,7,8,8-tridecafluorooctyl)-2,2'-esamethylenebispyridinium chloride (FGP6).

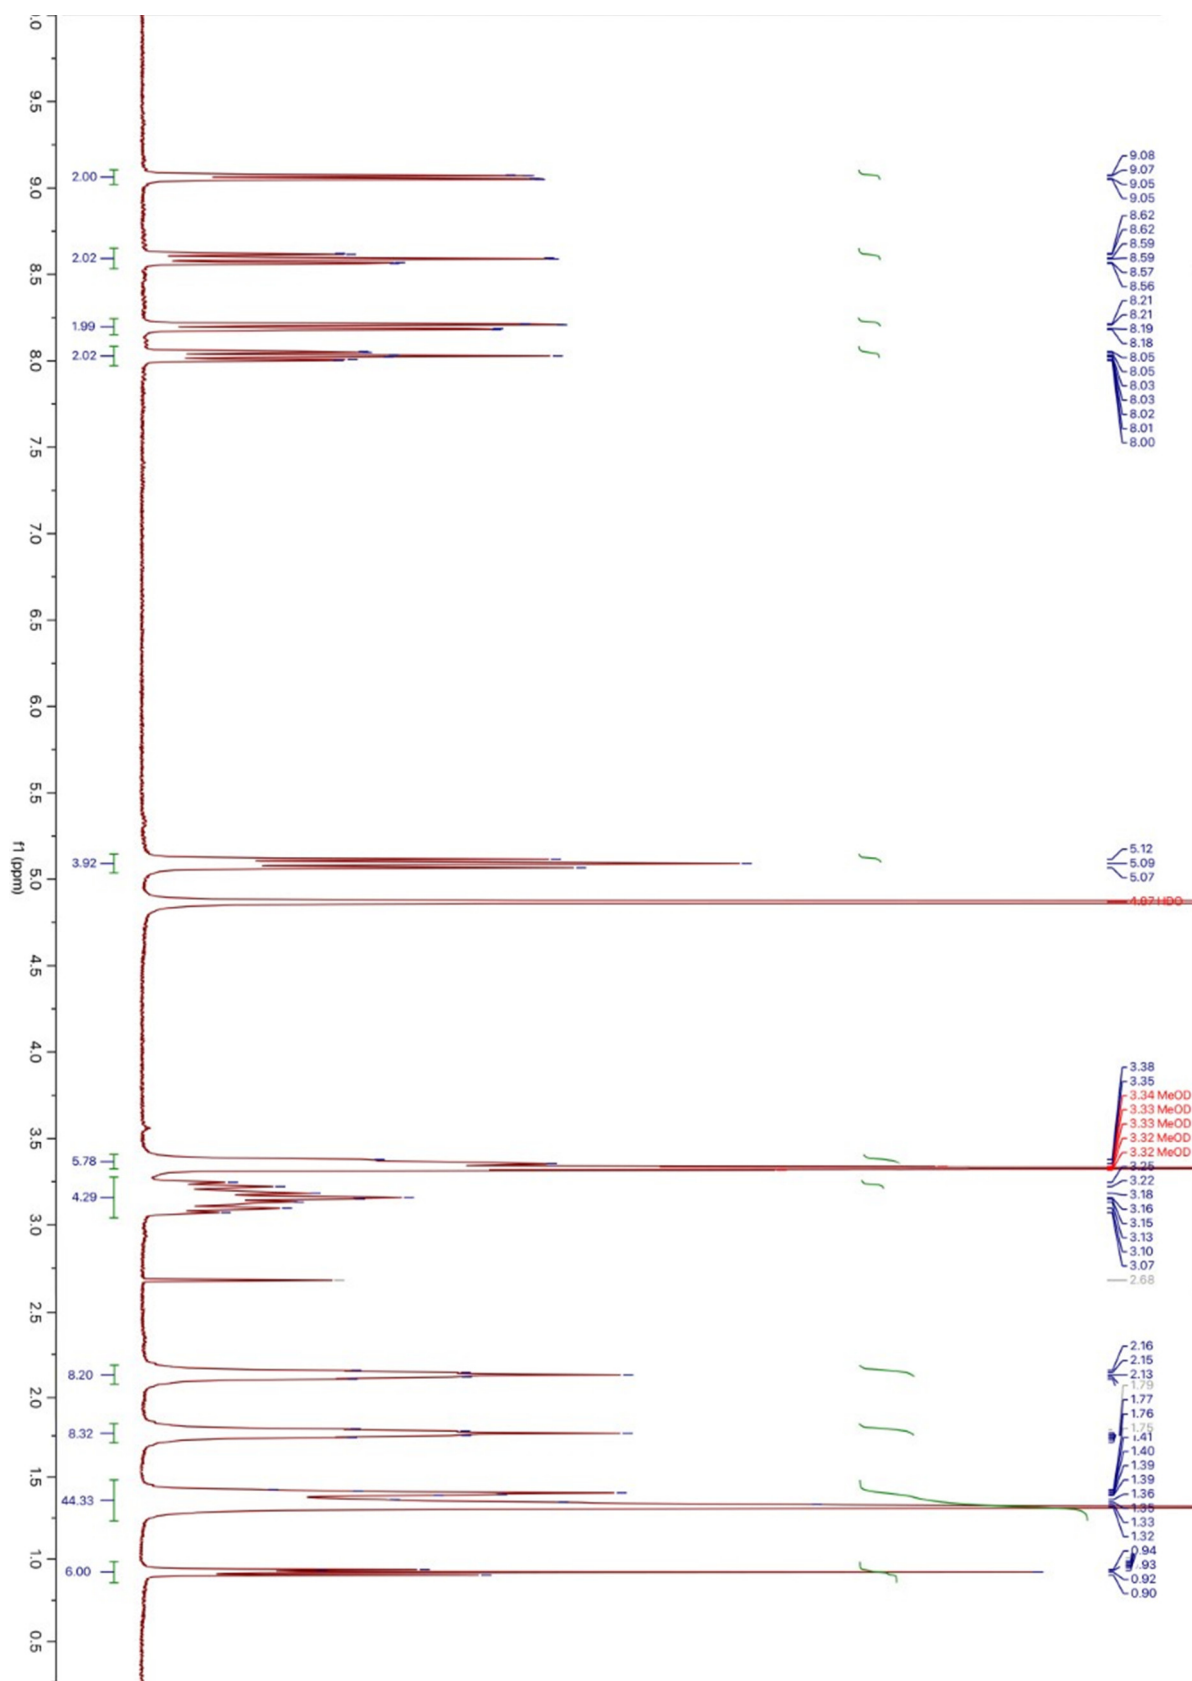

**Figure S3.**  $^1\text{H}$ -NMR of 1,1'-bis-hexadecyl-2,2'-hexamethylenebispyridinium chloride (GP16<sub>6</sub>).

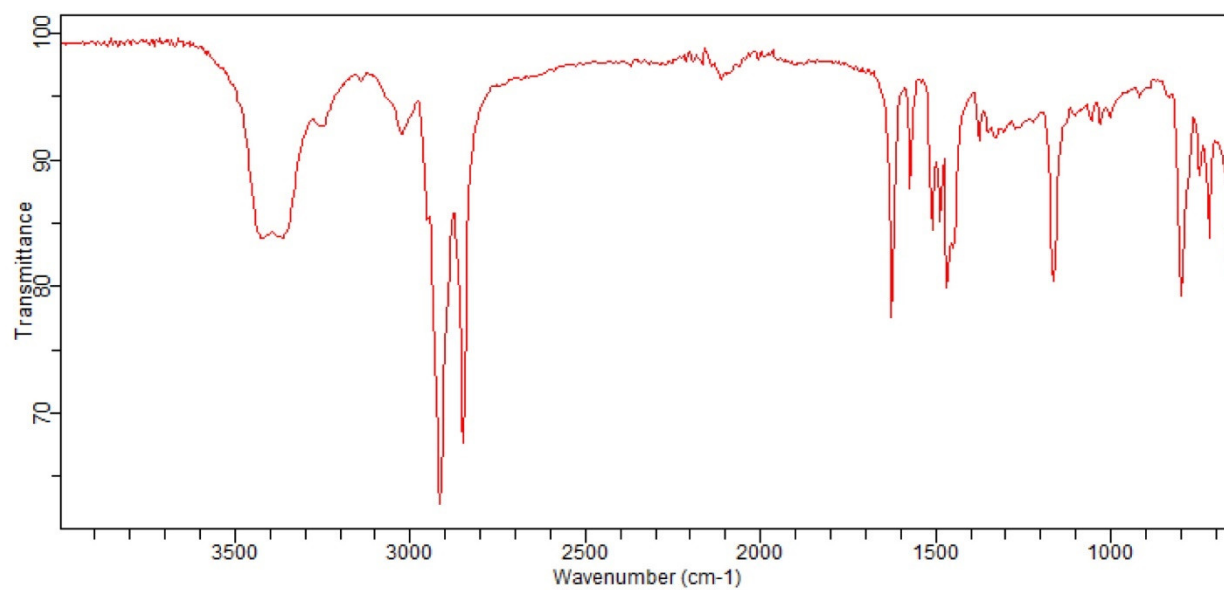

**Figure S4.** IR spectrum of 1,1'-bis-hexadecyl-2,2'-hexamethylenebispyridinium chloride (GP16\_6).

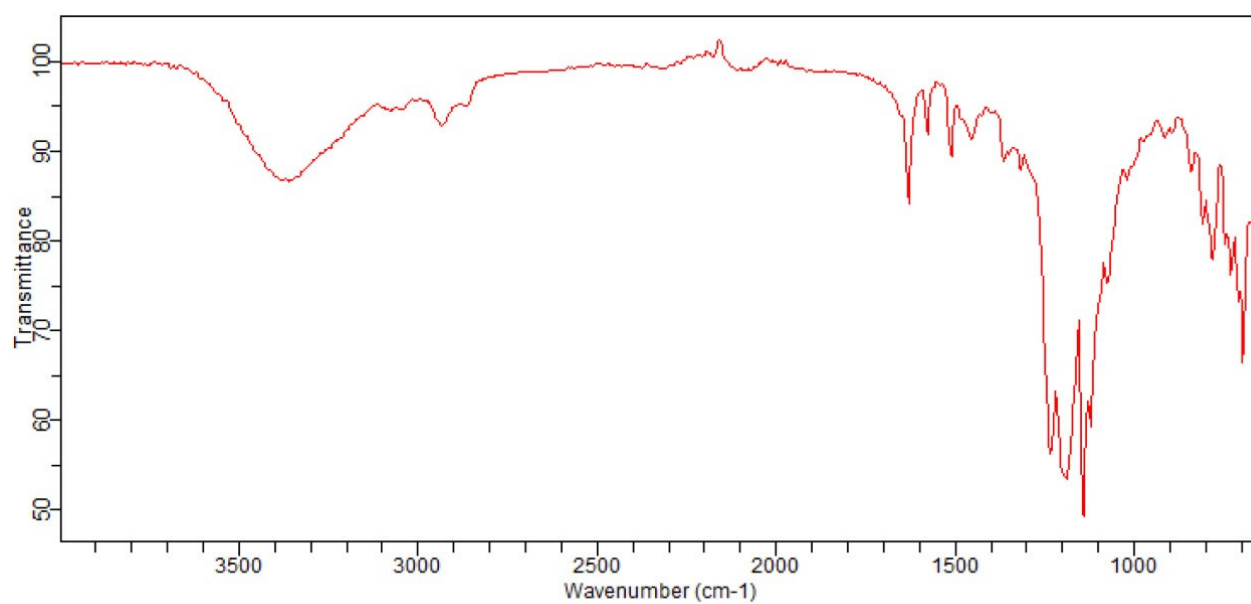

**Figure S5.** IR spectrum of 1,1'-bis(3,3,4,4,5,5,6,6,7,7,8,8-tridecafluorooctyl)-2,2'-esamethylenebispyridinium chloride (FGP6).

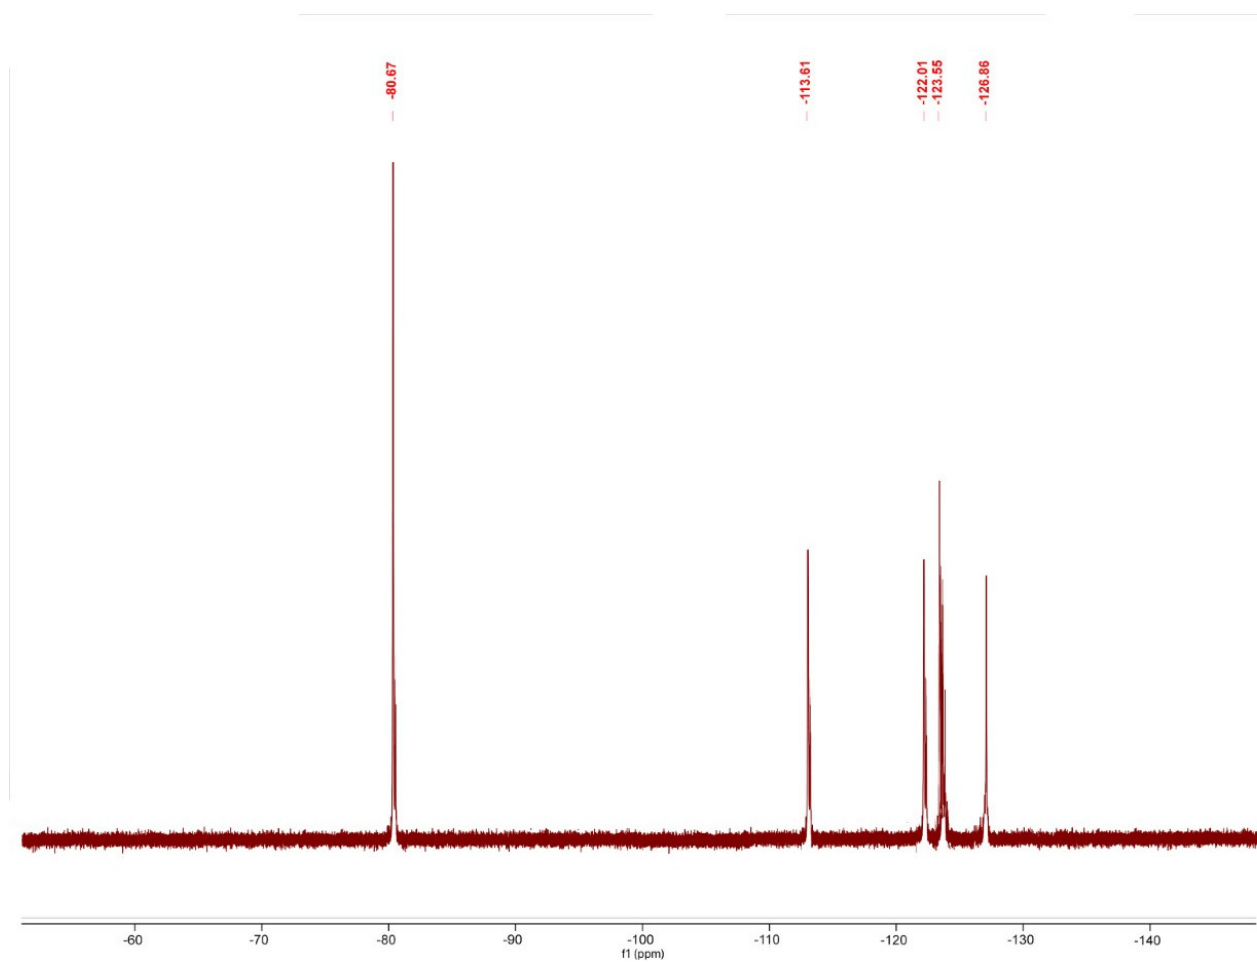

**Figure S6.**  $^{19}\text{F}$ -NMR of 1,1'-bis(3,3,4,4,5,5,6,6,7,7,8,8-tridecafluorooctyl)-2,2'-esamethylenebispyridinium chloride (FGP6).

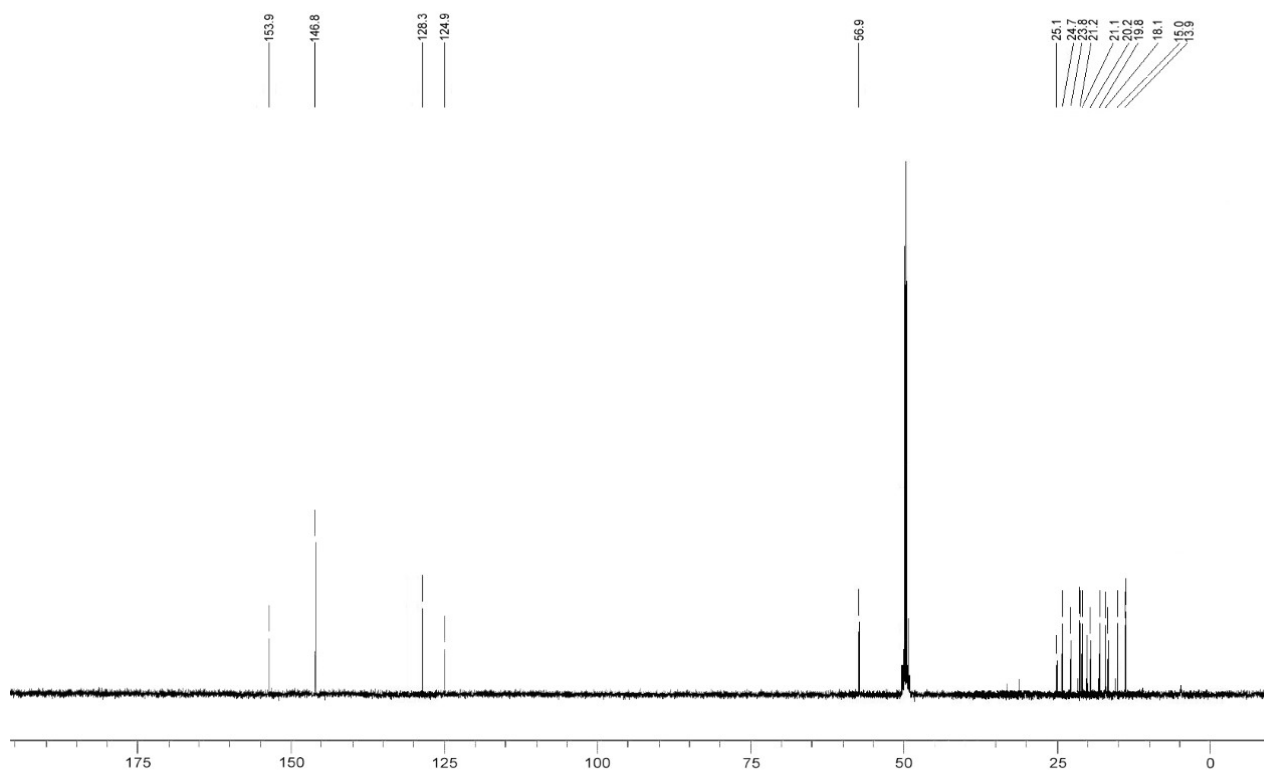

**Figure S7.** <sup>13</sup>C-NMR of 1,1'-bis-hexadecyl-2,2'-hexamethylenebispyridinium chloride (GP16\_6).

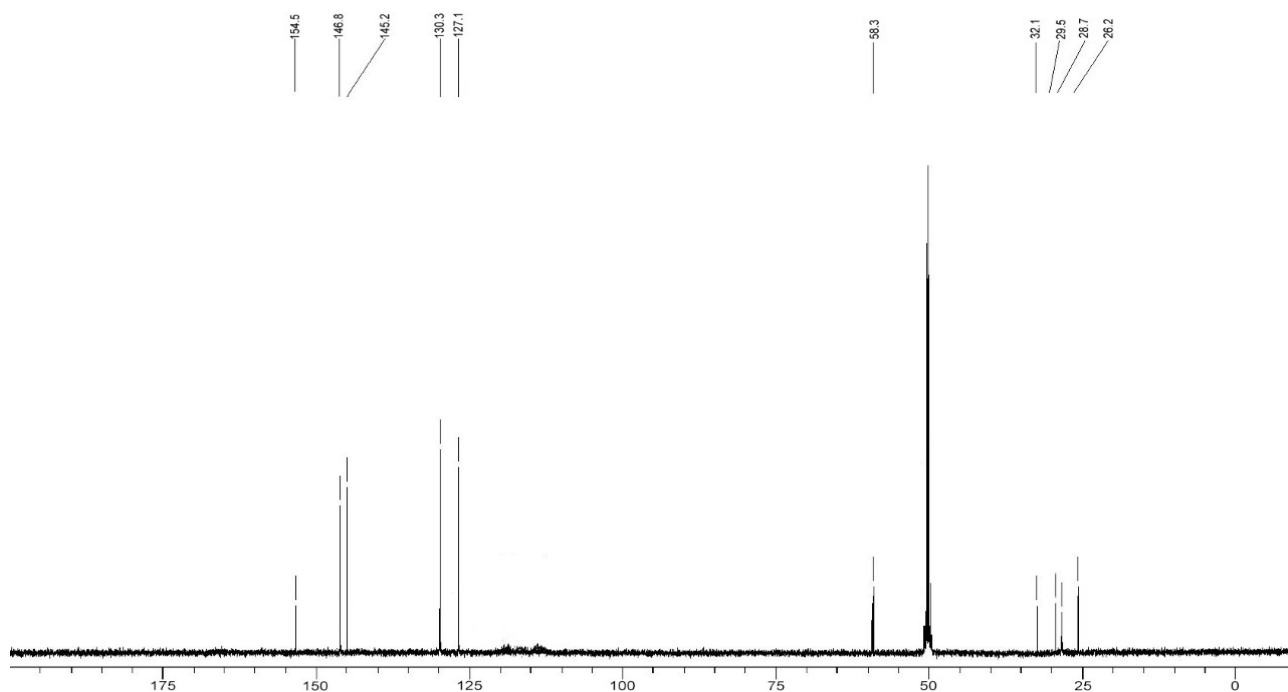

**Figure S8.** <sup>13</sup>C-NMR of 1,1'-bis(3,3,4,4,5,5,6,6,7,7,8,8-tridecafluorooctyl)-2,2'-esamethylenebispyridinium chloride (FGP6).

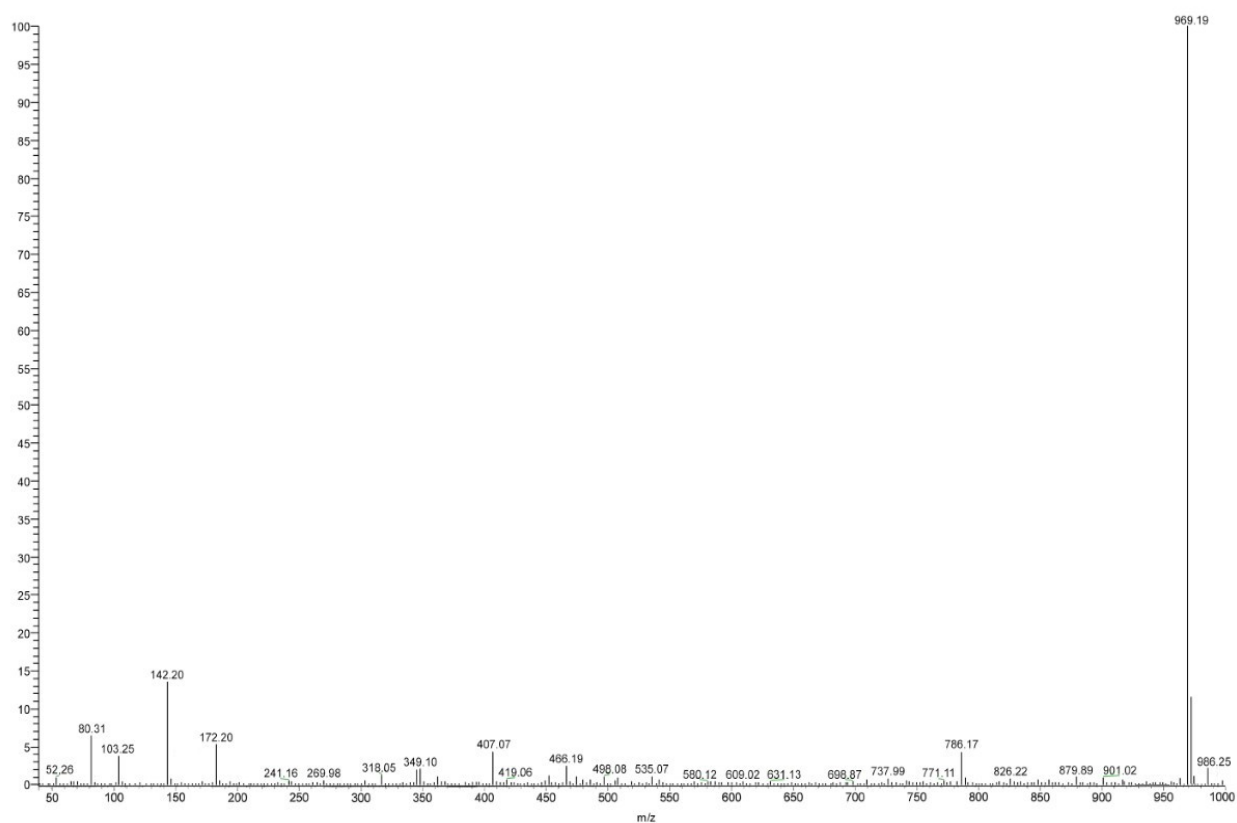

**Figure S9.** Mass spectrum of 1,1'-bis(3,3,4,4,5,5,6,6,7,7,8,8-tridecafluorooctyl)-2,2'-esamethylenebispyridinium chloride (FGP6).



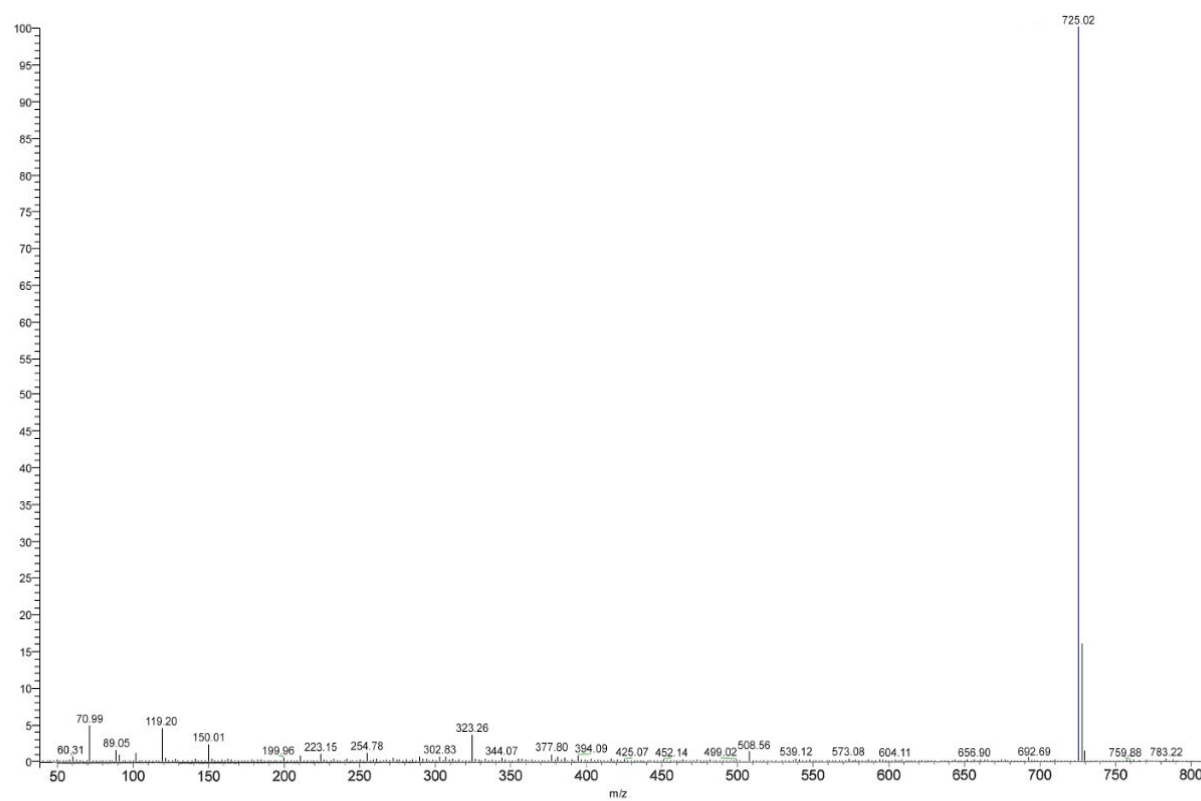

**Figure S10.** Mass spectrum of 1,1'-bis-hexadecyl-2,2'-hexamethylenebispyridinium chloride (GP16\_6).

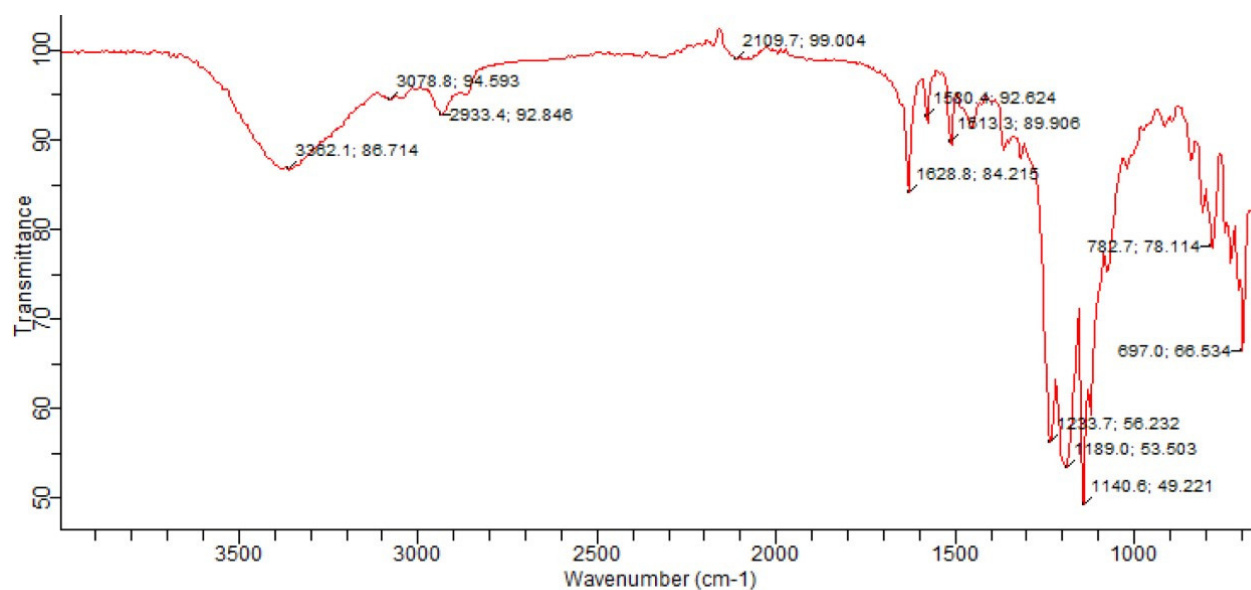

**Figure S11.** IR spectrum of 1,1'-bis(3,3,4,4,5,5,6,6,7,7,8,8-tridecafluorooctyl)-2,2'-esamethylenebispyridinium chloride (FGP6).

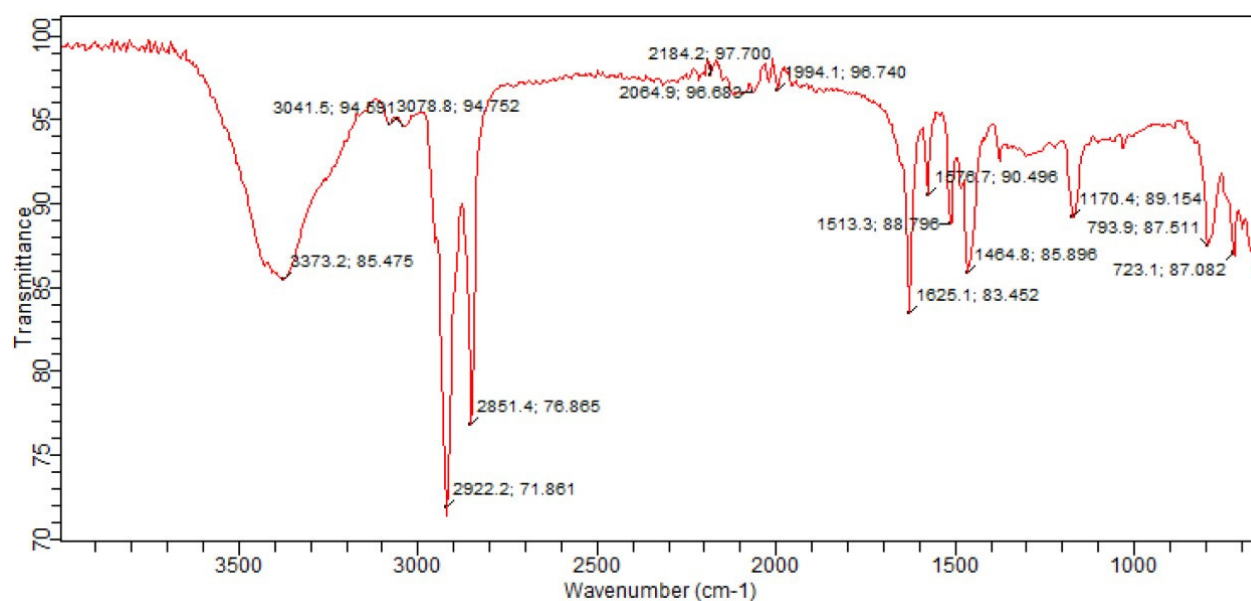

**Figure S12.** IR spectrum of 1,1'-bis-hexadecyl-2,2'-hexamethylenebispyridinium chloride (GP16\_6).
